1  
2  
3  
4  
5  
6  
7  
8  
9  
10  
11  
12  
13  
14  
15  
16  
17  
18  
19  
20  
21  
22  
23

## Computational imperfections in human visual search

Elina Stengård<sup>1</sup> & Ronald van den Berg<sup>1\*</sup>

<sup>1</sup> Department of Psychology, University of Uppsala, Uppsala, Sweden

\* Corresponding author

E-mail: [ronald.vandenberg@psyk.uu.se](mailto:ronald.vandenberg@psyk.uu.se) (RVDB)

24 **Abstract**

25 Numerous studies have reported that human behavior on perceptual inference tasks –  
26 such as cue combination and visual search – is well accounted for by optimal models.  
27 However, others have argued that optimal models are often overly flexible and, therefore,  
28 lack explanatory power. In addition, it has been suggested that inference performed by  
29 neural systems is inherently noisy, which would preclude optimality in many perception  
30 tasks. Here, we reconsider human performance on visual search by devising an approach  
31 that strongly reduces model flexibility and tests for suboptimalities due to imprecisions in  
32 neural inference. Subjects performed a target detection task in which targets and  
33 distractors were ellipses with orientations drawn from Gaussian distributions with  
34 different means. We controlled the level of sensory uncertainty through stimulus  
35 presentation time (short *vs.* unlimited) and the elongation of the ellipses (low *vs.* high).  
36 Moreover, we created four levels of *external* uncertainty by varying the amount of overlap  
37 between the target and distractor distributions. Since sensory noise was negligible in the  
38 conditions with unlimited display time, we were able to estimate deviations from  
39 optimality without having to fit free parameters. In conditions with short display time, we  
40 limited the flexibility of the optimal model by using a separate task to estimate sensory  
41 noise levels. We found clear evidence for suboptimalities in all tested conditions.  
42 Moreover, we estimate that the performance loss due to computational imperfections was  
43 of comparable magnitude to the loss due to sensory noise. Our results provide support for  
44 the proposal that neural inference is inherently imprecise and challenge previous claims  
45 of optimality in perception.

46

47

48

## 49 **Author summary**

50 The main task of perceptual systems is to create truthful representations of the world. They do  
51 so by using sensory information that is often astonishingly imprecise due to measurement errors  
52 in our senses. Consequently, it is often impossible to be 100% correct all the time on tasks that  
53 involve perception, such as judging whether a visual target is present in a cluttered scene.  
54 Observers are typically defined as optimal if they perform as well as theoretically possible given  
55 the sensory imprecisions. Numerous studies have reported that humans are optimal observers  
56 in perception-based tasks, but the validity of these findings has recently been questioned for  
57 two different reasons. First, it has been argued that a lot of the evidence is based on studies that  
58 used overly flexible models. Second, there are indications that inference performed by brains  
59 is inherently imprecise, due to limitations in the neural systems performing the inference. In  
60 this study, we reconsider optimality in perception by devising a research method that makes  
61 several improvements over previous studies. We apply this method to a visual search task and  
62 find clear indications of suboptimalities. Our findings imply that the perceptual systems may  
63 indeed not be as perfect as previously thought.

64

## 65 **Introduction**

66 Visual perception is the brain's ability to make inferences about the external world from visual  
67 information. It is often reported that human performance on this type of inference is optimal or  
68 "Bayesian" [1–5], which would mean that they perform as well as is possible given their sensory  
69 noise levels. Evidence for this has mainly come from tasks in which subjects integrate two  
70 sensory cues to estimate a common source. The optimal strategy in these tasks is to compute a  
71 weighted average of the two cues [6], where each weight is proportional to the cue's reliability<sup>1</sup>.  
72 This type of weighting is a hallmark of Bayesian observers and predicts that a subject's

---

<sup>1</sup> Defined as the inverse variance of the sensory noise distribution.

73 estimates are biased towards the more reliable cue, which has been confirmed in a large range  
74 of studies with both humans and other primates. Examples include integration of a visual and  
75 haptic cue to estimate the height of an object [7], a visual and proprioceptive [8] or auditory [9]  
76 cue to estimate object location, and two visual cues to estimate object depth [10,11] or object  
77 slant [12]. Moreover, it has been reported that optimality in perception extends to tasks with up  
78 to at least eight cues and in which the optimal strategy involves non-linear computations,  
79 including visual search [13–17], categorization [18], change detection [19], change localization  
80 [20], and sameness discrimination [21] tasks.

81         While these studies have provided valuable insights into basic mechanisms of  
82 perception – such as that humans take cue reliability into account when integrating sensory cues  
83 – they have also been criticized. One criticism is that the emphasis on optimality has led to an  
84 underreporting and underemphasizing of studies that have found violations of optimality  
85 [22,23]. Another, more fundamental criticism is that optimal models often lack explanatory  
86 power due to being overly flexible [23–26]. The risk of too much flexibility is that it may allow  
87 an optimal model to account for data from suboptimal observers. For example, when sensory  
88 noise levels are fitted as free parameters – as in most studies – an optimal model may account  
89 for suboptimalities in inference by overestimating these noise levels. In fact, several recent  
90 studies have argued that computational imprecisions are inherent to any kind of inference  
91 performed by a brain, due to factors such as noise in the underlying neural mechanisms,  
92 imprecise knowledge of the task statistics, and the use of deterministic approximations to  
93 complex computations [27–31]. If this is true, then it would mean that the suboptimalities  
94 caused by such imprecisions must somehow have gone unnoticed in previous studies, possibly  
95 due to using overly flexible models.

96         These concerns call for a reconsideration of optimality claims in perception. Here, we  
97 contribute to this enterprise by revisiting human performance on visual search, which is one of

98 the most commonly employed tasks in visual psychophysics and a task that has been reported  
99 to be performed optimally by humans [13–15]. Importantly, however, we use an approach that  
100 strongly limits model flexibility, in two different ways. First, we include experimental  
101 conditions in which sensory noise is negligible, such that deviations from optimality can be  
102 assessed without the need to fit any free parameters. In these conditions, we present stimuli at  
103 high contrast and with unlimited viewing time. Moreover, to avoid the task from becoming  
104 trivial, we add external noise to the stimuli. Hence, in these conditions, we essentially replace  
105 a latent parameter (sensory noise) with one that is fully under the experimenter’s control  
106 (external noise). An additional advantage of this approach is that it makes the task more  
107 consistent with naturalistic conditions, where inference often involves dealing with both  
108 internal and external uncertainty [32]. Second, to reduce model flexibility in conditions *with*  
109 sensory noise, we measure subjects’ sensory noise levels in a separate task and use these  
110 estimates to constrain the parameters of the optimal model. Finally, instead of testing the  
111 optimal model against a specific set of suboptimal decision rules – as previous studies have  
112 typically done – we test it against a more general model that is able to account for a broad  
113 variety of inferential imperfections. To preview our main result, in all tested conditions we find  
114 clear evidence for inferential suboptimalities.

115

## 116 **Experimental methods**

117

### 118 **Data and code sharing**

119 The experimental data are available at <https://osf.io/dkavj/>. Matlab code that reproduces the  
120 main results will be made available upon publication.

121

122

## 123 **Subjects**

124 Thirty subjects were recruited via advertisements at the psychology department of Uppsala  
125 University in Sweden and received payment in the form of cinema tickets or gift vouchers. All  
126 subjects had self-reported normal or corrected-to-normal vision and gave informed consent  
127 before the start of the experiment. No subjects were excluded from any of the analyses.

128

## 129 **Stimuli**

130 Stimuli were black ellipses ( $0.35 \text{ cd/m}^2$ ) with an area of  $0.60 \text{ deg}^2$  presented on a gray  
131 background ( $71 \text{ cd/m}^2$ ; Fig. 1A). The task-relevant feature in all experiments was ellipse  
132 orientation, with  $0^\circ$  defined as vertical. The eccentricity (i.e., elongation) of an ellipse  
133 determined the level of sensory noise with which observers observed its orientation: the higher  
134 its eccentricity, the lower the level of sensory noise (Fig. 1B). Stimuli were generated using the  
135 Psychophysics Toolbox [33] for Matlab and presented at fixed locations along an invisible  
136 circle at the center of the screen and with a radius of 7 degrees of visual angle.

137

## 138 **General procedure**

139 Each subject completed multiple experimental sessions that lasted about one hour each. At the  
140 start of the first session, they received general information about the experiment and then  
141 performed a discrimination task (Fig. 1A) followed by one condition of the visual search task.  
142 In the remaining sessions, they only performed the visual search task (Fig 1C). We created eight  
143 conditions for the visual search task by using a  $2 \times 4$  factorial design (Table 1). The factors  
144 specify the stimulus presentation time (short vs. unlimited) and the level of external uncertainty  
145 (none, 5%, 10%, and 15%; explained below). Different groups of subjects performed different  
146 subsets of these conditions.

147

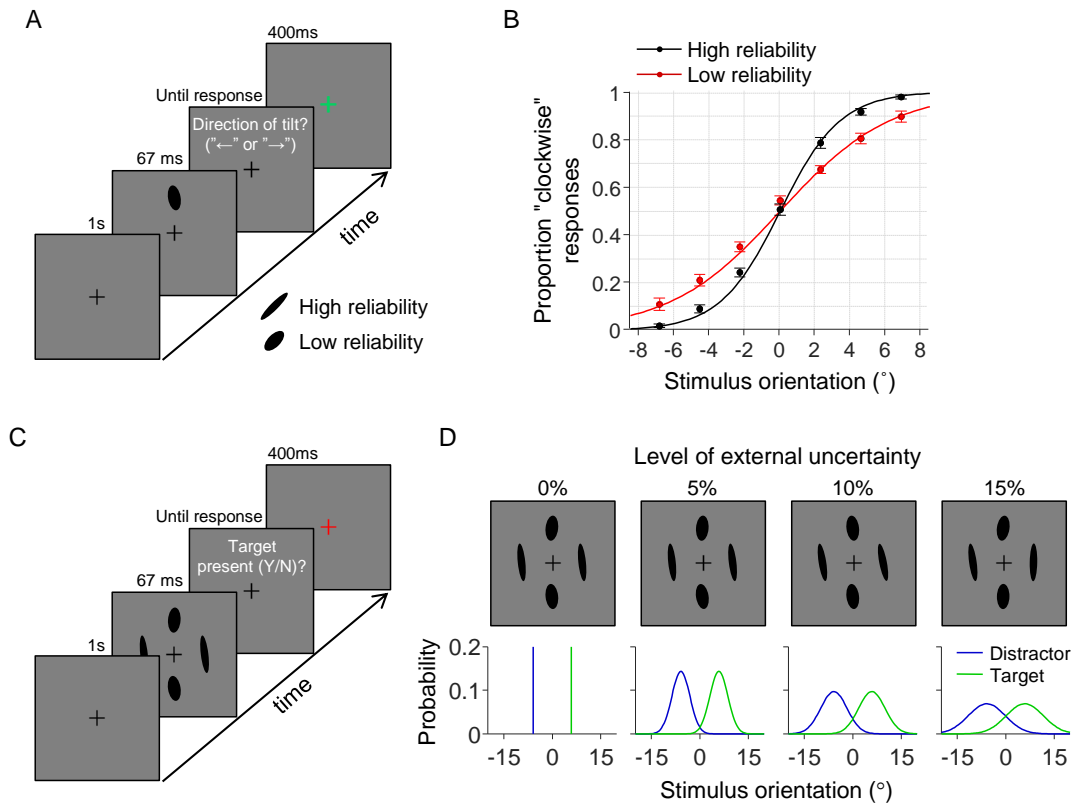

**Fig. 1. Experimental design.** (A) Illustration of a trial in the discrimination task. A single oriented ellipse was presented and subjects reported its direction of tilt relative to vertical. The elongation of the stimulus could take two values; we refer to the most elongated type of ellipse as a “high reliability” stimulus and the less elongated type as a “low reliability” stimulus. Feedback was provided by briefly turning the fixation cross red (error) or green (correct) after the response was given. (B) The subject-averaged data (filled circles) and model fits (curves) reveal that sensitivity was higher for stimuli with high reliability (black) compared to those with low reliability (red). Error bars represent 1 s.e.m. (C) Illustration of a trial in the visual search task with brief stimulus presentation time. (D) Top: examples of target-present displays under the four different levels of external uncertainty. Bottom: examples of distributions used in the experiment and from which the stimuli in the example displays were drawn. In all four examples, the top stimulus is a target and the other three are distractors.

148

149

150 **Table 1. Overview of visual search task conditions and experimental subject groups. Each**  
 151 **group consisted of 10 subjects. The condition with unlimited stimulus time and no external**  
 152 **uncertainty was excluded from the experiment, because subjects are expected to perform**  
 153 **100% correct on it.**

|                       |               | Level of external uncertainty |              |              |              |
|-----------------------|---------------|-------------------------------|--------------|--------------|--------------|
|                       |               | None                          | 5%           | 10%          | 15%          |
| Stimulus display time | Short (67 ms) | A<br>Group 1                  | B<br>Group 2 | C<br>Group 1 | D<br>Group 3 |
|                       | Unlimited     | -                             | E<br>Group 2 | F<br>Group 1 | G<br>Group 3 |

154

155

156 **Discrimination task**

157 On each trial, the subject was presented with a single ellipse (67 ms) and reported whether it  
158 was tilted clockwise or counterclockwise with respect to vertical (Fig. 1A). Trial-to-trial  
159 feedback was provided by briefly turning the fixation cross in the inter-trial screen green  
160 (correct) or red (incorrect). The eccentricity of the stimulus was 0.80 on half of the trials (“low  
161 reliability”) and 0.94 on the other half (“high reliability”), randomly intermixed. On the first 20  
162 trials, the orientation of the stimulus was drawn from a uniform distribution on the range  $-5^\circ$  to  
163  $+5^\circ$ . In the remaining trials, a cumulative Gaussian was fitted to the data collected thus far and  
164 the orientation for the next trial was then randomly drawn from the domain corresponding to  
165 the 55-95% correct range. This adaptive procedure increased the information obtained from  
166 each trial by reducing the number of extremely easy and difficult trials. Subjects completed 500  
167 trials of this task.

168

169 **Visual search without external uncertainty (condition A)**

170 In this condition, subjects were on each trial presented with four oriented ellipses. On half of  
171 the trials, all ellipses were distractors. On the other half, three ellipses were distractors and one  
172 was a target. The task was to report whether a target was present. Targets were tilted  $\mu$  degrees  
173 in clockwise direction from vertical and distractors were tilted  $\mu$  degrees in counterclockwise  
174 direction. The value of  $\mu$  was customized for each subject (Table 2) such that an optimal  
175 observer with sensory-noise levels equal to the ones estimated from the subject's  
176 discrimination-task data had a predicted accuracy of 85% correct. Stimulus display time was  
177 67 ms and each stimulus was presented with an ellipse eccentricity of either 0.80 (“low  
178 reliability”) or 0.94 (“high reliability”). On each trial, the number of high-reliability stimuli was  
179 drawn from a uniform distribution on integers 0 to 4 and reliability values were then randomly



180 distributed across the four stimuli. Feedback was provided in the same way as in the  
 181 discrimination task. The task consisted of 1500 trials divided equally over 12 blocks with short  
 182 forced breaks between blocks.

183

184 **Table 2. Overview of estimated sensory noise levels in the discrimination task ( $\tilde{\sigma}_{\text{low}}$ ,  $\tilde{\sigma}_{\text{high}}$   
 185 ) and the customized experimental parameters ( $\mu$ ,  $\sigma_{\text{external}}$ ) in the visual search task.**

| Level of external uncertainty (%) | Subj ID | $\tilde{\sigma}_{\text{low}}$ (°) | $\tilde{\sigma}_{\text{high}}$ (°) | $\mu$ (°) | $\sigma_{\text{external}}$ (°) |
|-----------------------------------|---------|-----------------------------------|------------------------------------|-----------|--------------------------------|
| 0                                 | 1       | 7.1                               | 4.6                                | 8.0       | 0                              |
| 0                                 | 2       | 5.5                               | 2.0                                | 5.0       | 0                              |
| 0                                 | 3       | 6.4                               | 2.3                                | 5.8       | 0                              |
| 0                                 | 4       | 3.8                               | 1.8                                | 3.8       | 0                              |
| 0                                 | 5       | 4.6                               | 2.2                                | 4.5       | 0                              |
| 0                                 | 6       | 4.0                               | 3.3                                | 5.0       | 0                              |
| 0                                 | 7       | 3.1                               | 1.3                                | 2.9       | 0                              |
| 0                                 | 8       | 6.8                               | 2.8                                | 6.4       | 0                              |
| 0                                 | 9       | 3.3                               | 2.4                                | 3.9       | 0                              |
| 0                                 | 10      | 4.5                               | 3.0                                | 5.1       | 0                              |
| 5                                 | 11      | 4.4                               | 3.4                                | 5.3       | 2.4                            |
| 5                                 | 12      | 3.7                               | 3.0                                | 4.5       | 2.1                            |
| 5                                 | 13      | 4.2                               | 2.6                                | 4.6       | 2.1                            |
| 5                                 | 14      | 3.9                               | 2.2                                | 4.1       | 1.9                            |
| 5                                 | 15      | 4.3                               | 3.1                                | 4.9       | 2.3                            |
| 5                                 | 16      | 6.5                               | 2.4                                | 5.9       | 2.8                            |
| 5                                 | 17      | 6.2                               | 3.3                                | 6.4       | 2.9                            |
| 5                                 | 18      | 3.8                               | 2.0                                | 3.9       | 1.8                            |
| 5                                 | 19      | 5.1                               | 3.0                                | 5.4       | 2.5                            |
| 5                                 | 20      | 4.6                               | 2.6                                | 4.8       | 2.2                            |
| 10                                | 1       | 7.1                               | 4.6                                | 8.0       | 5.6                            |
| 10                                | 2       | 5.5                               | 2.0                                | 5.0       | 3.4                            |
| 10                                | 3       | 6.4                               | 2.3                                | 5.8       | 4.1                            |
| 10                                | 4       | 3.8                               | 1.8                                | 3.8       | 2.6                            |
| 10                                | 5       | 4.6                               | 2.2                                | 4.5       | 3.1                            |
| 10                                | 6       | 4.0                               | 3.3                                | 5.0       | 3.4                            |
| 10                                | 7       | 3.1                               | 1.3                                | 2.9       | 2.1                            |
| 10                                | 8       | 6.8                               | 2.8                                | 6.4       | 4.3                            |
| 10                                | 9       | 3.3                               | 2.4                                | 3.9       | 2.7                            |
| 10                                | 10      | 4.5                               | 3.0                                | 5.1       | 3.4                            |
| 15                                | 21      | 6.2                               | 2.6                                | 5.9       | 5.8                            |
| 15                                | 22      | 7.7                               | 2.4                                | 6.8       | 6.7                            |
| 15                                | 23      | 6.9                               | 4.2                                | 7.5       | 7.1                            |
| 15                                | 24      | 6.7                               | 4.8                                | 7.9       | 7.5                            |

|    |    |     |     |     |     |
|----|----|-----|-----|-----|-----|
| 15 | 25 | 7.5 | 4.5 | 8.2 | 7.8 |
| 15 | 26 | 5.1 | 3.6 | 5.8 | 5.7 |
| 15 | 27 | 4.1 | 2.3 | 4.3 | 4.3 |
| 15 | 28 | 8.1 | 3.3 | 7.7 | 7.4 |
| 15 | 29 | 7.2 | 5.2 | 8.5 | 8.1 |
| 15 | 30 | 7.1 | 3.3 | 6.9 | 6.8 |

---

186

### 187 **Visual search with external uncertainty and short display time (conditions B-D)**

188 The three visual search conditions with external uncertainty and short display time were  
189 identical to the condition just described, except that the orientations of the target and distractors  
190 were no longer fixed, but instead drawn from partly overlapping Gaussian distributions (Fig.  
191 1D). These distributions had means  $\mu$  and  $-\mu$ , respectively (see above), and a standard deviation  
192  $\sigma_{\text{external}}$ . The value of  $\sigma_{\text{external}}$  was customized for each subject (Table 2) such that the accuracy  
193 of an optimal observer would drop by 5, 10, or 15% compared to the same condition without  
194 external uncertainty. We refer to each of these percentages as a *level of external uncertainty*.  
195 Subjects completed 1500 trials divided equally over 12 blocks with short forced breaks between  
196 blocks.

197

### 198 **Visual search with external uncertainty and unlimited display time (conditions E-G)**

199 These three conditions were identical to conditions B-D, except for the following two  
200 differences. First, stimuli were presented with an ellipse eccentricity of 0.97 and stayed on the  
201 screen until a response was provided, such that the sensory noise levels were reduced to a  
202 presumably negligible level. Second, this condition contained 500 instead of 1500 trials. Each  
203 subject completed this condition before the equivalent condition with short display times.

204

### 205 **Statistical analyses**

206 All Bayesian statistical tests were performed using the JASP software package [34] with default  
207 settings. The output of these tests is a Bayes factor, denoted  $\text{BF}_{10}$ , which specifies the ratio

208 between how likely the data are under the alternative hypothesis compared to how likely they  
209 are under the null hypothesis. Hence, values smaller than 1 indicate evidence for the null  
210 hypothesis and values larger than 1 indicate evidence for the alternative hypothesis. When a  
211 test supports the null hypothesis we usually report  $BF_{01}=1/BF_{10}$ .

212

## 213 **Modeling methods**

214

### 215 **Optimal decision variable**

216 We denote target presence by a binary variable  $T$  ( $-1$ =absent,  $1$ =present), set size by  $N$ , the  
217 stimulus values by  $\mathbf{s}=\{s_1, s_2, \dots, s_N\}$ , and the observer's noisy observations of the stimulus  
218 values by  $\mathbf{x}=\{x_1, x_2, \dots, x_N\}$ . For convenience, Table 3 presents an overview of all symbols we  
219 use in our mathematical descriptions of the models and experiments. The Bayesian optimal  
220 observer reports "target present" if the posterior probability of target presence exceeds that of  
221 target absence,  $p(T=1|\mathbf{x})>p(T=-1|\mathbf{x})$ . This strategy is equivalent to reporting "target present" if  
222 the log posterior ratio exceeds 0,

$$223 \quad d(\mathbf{x}) \equiv \log \frac{p(T=1|\mathbf{x})}{p(T=-1|\mathbf{x})} > 0.$$

224 where  $d(\mathbf{x})$  is referred to as the global decision variable. Taking into account the statistical  
225 structure of the task (S1 Fig), this evaluates to (S1 Appendix):

$$226 \quad d(\mathbf{x}) = \log \left( \frac{1}{N} \sum_{i=1}^N d_{\text{local}}(x_i) \right), \quad (1)$$

227 where

$$228 \quad d_{\text{local}}(x_i) = \exp \left[ \frac{(x_i + \mu)^2 - (x_i - \mu)^2}{2(\sigma_i^2 + \sigma_{\text{external}}^2)} \right] \quad (2)$$

229 is referred to as the local decision variable. Hence, the optimal decision variable is the log of  
 230 an average of local decision variables, each of which represents the evidence (posterior ratio)  
 231 for target presence:  $d_{\text{local}}(x_i) < 1$  is evidence for a distractor at location  $i$  and  $d_{\text{local}}(x_i) > 1$  is  
 232 evidence for a target. In the four conditions with short displays times (A-D, Table 1), the sensory  
 233 noise level associated with a stimulus,  $\sigma_i$ , differed for stimuli with low and high reliability. In  
 234 the three conditions with unlimited display time (conditions E-G), we assume  $\sigma_i$  to be 0.

235 We mentioned earlier that optimal observers – just like good detectives – weight each cue  
 236 by its reliability. In the visual search task, each stimulus observation,  $x_i$ , is a cue. Equation (2)  
 237 demonstrates that the optimal observer indeed weights these cues by their reliability: the larger  
 238 the sensory noise,  $\sigma_i$ , the smaller the magnitude of the local evidence for target presence,  
 239  $d_{\text{local}}(x_i)$ .

240

241 **Table 3. Overview of the symbols used in our mathematical descriptions of the**  
 242 **experiments and models.**

| Symbol                                                      | Description                                                                                                                                                                                                                                            |
|-------------------------------------------------------------|--------------------------------------------------------------------------------------------------------------------------------------------------------------------------------------------------------------------------------------------------------|
| $\tilde{\sigma}_{\text{low}}, \tilde{\sigma}_{\text{high}}$ | Estimated sensory noise levels in the discrimination task                                                                                                                                                                                              |
| $-\mu, +\mu$                                                | Means of the distractor and target distributions, respectively                                                                                                                                                                                         |
| $\sigma_{\text{external}}$                                  | Standard deviation of the distractor and target distributions in the visual search task                                                                                                                                                                |
| $N$                                                         | Number of stimuli in the visual search task                                                                                                                                                                                                            |
| $L$                                                         | Location of target in the visual search task (when present)                                                                                                                                                                                            |
| $T$                                                         | Target presence in the visual search task ( $-1$ =absent, $+1$ =present)                                                                                                                                                                               |
| $s_i$                                                       | Orientation of the $i$ -th stimulus in the visual search task                                                                                                                                                                                          |
| $x_i$                                                       | Noisy observation of $s_i$                                                                                                                                                                                                                             |
| $\sigma_i$                                                  | Estimated sensory noise levels associated with stimulus $s_i$ in the visual search task; computed as $\sigma_i = \alpha \tilde{\sigma}_{\text{low}}$ when $s_i$ has low reliability and as $\sigma_i = \alpha \tilde{\sigma}_{\text{high}}$ otherwise. |
| $\hat{\sigma}_i$                                            | Sensory noise level assumed by the observer in the $i$ -th stimulus when computing the local decision variable                                                                                                                                         |
| $\eta$                                                      | Computational noise, a Gaussian random variable with mean zero                                                                                                                                                                                         |
| $\sigma_{\text{computational}}$                             | Standard deviation of the distribution of the computational noise                                                                                                                                                                                      |

243

## 244 **Models**

245 To test for deviations from optimality, we extend the optimal model with two types of  
246 suboptimality.

247 **Suboptimality 1: imperfect cue weighting.** As explained above, a hallmark of optimal  
248 observers is that they weight sensory cues by their reliability, which requires subjects to have  
249 perfect knowledge of their own sensory noise levels. Although it has been suggested that such  
250 knowledge may be implicitly represented in the neural representation of the stimulus [35], we  
251 allow for possible imperfections in this knowledge by introducing a variable  $\hat{\sigma}_i$  that represents  
252 the observer's "assumed" level of sensory noise in the  $i$ -th stimulus when computing the local  
253 decision variable related to this stimulus,

$$254 \quad d_{\text{local}}(x_i) = \exp\left[\frac{(x_i + \mu)^2 - (x_i - \mu)^2}{2(\hat{\sigma}_i^2 + \sigma_{\text{external}}^2)}\right]. \quad (3)$$

255 The optimal local decision variable is the special case in which the assumed level of noise is  
256 identical to the true level of noise with which stimuli are encoded,  $\hat{\sigma}_i = \sigma_i$ .

257 **Suboptimality 2: computational noise.** The second kind of suboptimality that we  
258 incorporate in the model is "computational noise" on the global decision variable,

$$259 \quad d(\mathbf{x}) = \log\left(\frac{1}{N} \sum_{i=1}^N d_{\text{local}}(x_i)\right) + \eta, \quad (4)$$

260 where  $\eta$  is a zero-mean Gaussian random variable with a standard deviation of  $\sigma_{\text{computational}}$ . One  
261 way to interpret this parameter is by thinking of it as capturing effects caused by random  
262 variability in the activity of the neurons that encode the global decision variable. However,  
263 simulations (Fig. 2) show that this parameter may also capture effects caused by other types of  
264 suboptimality, including noise in the computation or representation of the local decision

265 variables, incorrect knowledge of experimental parameters  $\mu$  and  $\sigma_{\text{external}}$ , and incorrect cue  
266 weighting<sup>2</sup>.

267 **Factorial model design.** Combining Eqs. (3) and (4) yields

$$268 \quad d(\mathbf{x}) = \log \left( \frac{1}{N} \sum_{i=1}^N \exp \left[ \frac{(x_i + \mu)^2 - (x_i - \mu)^2}{2(\hat{\sigma}_i^2 + \sigma_{\text{external}}^2)} \right] \right) + \eta. \quad (5)$$

269 Based on this equation, we implement a 3×2 factorial set of models (Table 4). The first factor  
270 determines how the model weights sensory cues:

271 i) *Optimal weighting.* The observer has perfect knowledge of the amount of sensory noise  
272 at each location and uses this knowledge perfectly when computing local decision  
273 variables,  $\hat{\sigma}_i = \sigma_i$ .

274 ii) *Suboptimal weighting.* The observer weights evidence differently for low-reliability and  
275 high-reliability stimuli, but possibly using weights that deviate from the optimal ones.

276 We model this by setting  $\hat{\sigma}_i = \hat{\sigma}_{\text{low}}$  for low-reliability stimuli and  $\hat{\sigma}_i = \hat{\sigma}_{\text{high}}$  for high-  
277 reliability stimuli, where  $\hat{\sigma}_{\text{low}}$  and  $\hat{\sigma}_{\text{high}}$  are free parameters. This option allows for  
278 under-weighting or over-weighting of stimuli (e.g.,  $\hat{\sigma}_{\text{low}} < \sigma_{\text{low}}$  would result in  
279 overweighting of low-reliability stimuli).

280 iii) *No weighting.* The observer does not differentiate between low-reliability and high-  
281 reliability stimuli when computing local evidence,  $\hat{\sigma}_i = \hat{\sigma}_{\text{both}}$ , where  $\hat{\sigma}_{\text{both}}$  is a free  
282 parameter.

283 The second factor determines the presence of computational imperfections:

---

<sup>2</sup> Even though incorrect cue weighting appears as computational noise on the decision variable, the models can still distinguish between the effects that both types of suboptimality have on the response data (see section *Verification of analysis methods* in Results).

- 284 i) *No computational imperfections.* There is no computational noise,  $\sigma_{\text{computational}}=0$ .
- 285 ii) *Imperfections in the computation of the global decision variable.* The global decision
- 286 variable,  $d(\mathbf{x})$ , is corrupted by noise drawn from a zero-mean Gaussian distribution with
- 287 a standard deviation  $\sigma_{\text{computational}}\geq 0$ .
- 288

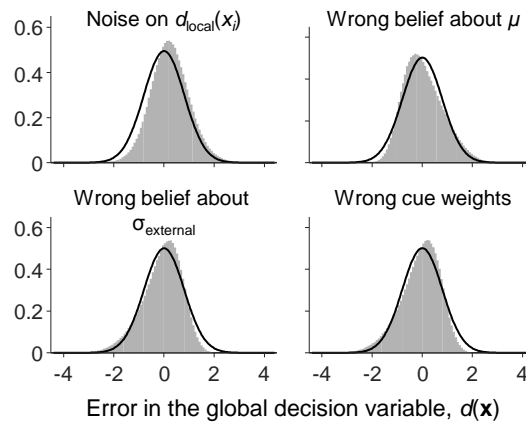

**Fig. 2. Four types of suboptimality that produce near-normally distributed errors in the global decision variable.** We simulated 1 million trials of the visual search task and computed for each trial the global decision variable in four suboptimal variants of the optimal model. The histograms (gray areas) show the distributions of the error in these suboptimal decision variables relative to the optimal one. In the first variant, local decision variables were corrupted by Gaussian noise (top left). In the second and third variants, local decision variables were computed using incorrect values for the mean (top right) or standard deviation (bottom left) of the stimulus distributions. In the last variant, local decision variables were computed using incorrect sensory weights (bottom right). All four distributions are reasonably well approximated by a Gaussian distribution (black curves). This suggests that the behavioral effects of these suboptimalities can be captured by a model in which the global optimal decision variable is corrupted by Gaussian noise.

289

290 **Table 4. Overview of models for the visual search task with sensory uncertainty. Model**

291 **M5 is the optimal model.**

| Model ID | Factor 1: Sensory weighting | Factor 2: Computational noise | Free parameters                                                                                |
|----------|-----------------------------|-------------------------------|------------------------------------------------------------------------------------------------|
| M1       | None                        | No                            | $\alpha, \hat{\sigma}_{\text{both}}$                                                           |
| M2       | None                        | Yes                           | $\alpha, \hat{\sigma}_{\text{both}}, \sigma_{\text{computational}}$                            |
| M3       | Suboptimal                  | No                            | $\alpha, \hat{\sigma}_{\text{low}}, \hat{\sigma}_{\text{high}}$                                |
| M4       | Suboptimal                  | Yes                           | $\alpha, \hat{\sigma}_{\text{low}}, \hat{\sigma}_{\text{high}}, \sigma_{\text{computational}}$ |
| M5       | Optimal                     | No                            | $\alpha$                                                                                       |
| M6       | Optimal                     | Yes                           | $\alpha, \sigma_{\text{computational}}$                                                        |

## 292 **Simplified model for conditions without sensory uncertainty**

293 In three of the experimental conditions (E-G, Table 1), stimuli are presented at high contrast  
294 and can be viewed for as long as the subject wants to. Assuming that sensory noise is negligible  
295 in these conditions,  $\sigma_i \approx 0$ , the stimulus observations,  $\mathbf{x}$ , are equal to the presented stimulus  
296 orientations,  $\mathbf{s}$ . The optimal decision variable can then be written directly as a function of  $\mathbf{s}$ , and  
297 simplifies to

$$298 \quad d(\mathbf{s}) = \log \left( \frac{1}{N} \sum_{i=1}^N \exp \left[ \frac{(s_i + \mu)^2 - (s_i - \mu)^2}{2\sigma_{\text{external}}^2} \right] \right). \quad (6)$$

299 Without sensory noise, there can be no suboptimality in sensory cue weights. Therefore,  
300 computational noise is the only suboptimality that we model in these conditions, in the same  
301 way as above. The optimal decision variable in the model for conditions without sensory noise  
302 is thus computed as

$$303 \quad d(\mathbf{s}) = \log \left( \frac{1}{N} \sum_{i=1}^N \exp \left[ \frac{(s_i + \mu)^2 - (s_i - \mu)^2}{2\sigma_{\text{external}}^2} \right] \right) + \eta. \quad (7)$$

304

## 305 **Model fitting and model comparison**

306 We use an adaptive Bayesian optimization method [37] to find maximum-likelihood estimates  
307 of model parameters, at the level of individual subjects. Model evidence is measured as the  
308 Akaike Information Criterion [38] and interpreted using the rules of thumb provided by  
309 Burnham & Anderson [39].

310

## 311 **Constraining of estimated sensory noise levels**

312 We use the estimates of  $\tilde{\sigma}_{\text{low}}$  and  $\tilde{\sigma}_{\text{high}}$  from the discrimination task (Table 2) to constrain the  
313 sensory noise levels in the models for visual search. However, set size differed between the two



314 experiments (1 vs. 4) and previous work has shown that sensory noise levels may increase with  
315 set size [15,36]. In particular, those studies found that the standard deviation of the noise  
316 distribution can increase up to a factor 2 between set sizes 1 and 4, depending on the  
317 heterogeneity of the distractors (Fig. 7B in [15] and Fig. 9 in [36]). Therefore, we expect that  
318 sensory noise levels in the visual search task were between a factor 1 and 2 larger as in the  
319 discrimination task. We denote this factor by  $\alpha$ . Instead of fitting  $\sigma_{\text{low}}$  and  $\sigma_{\text{high}}$  in the visual  
320 search task as two entirely free parameters, we compute them as  $\sigma_{\text{low}} = \alpha \tilde{\sigma}_{\text{low}}$  and  $\sigma_{\text{high}} = \alpha \tilde{\sigma}_{\text{high}}$   
321 , and we instead fit  $\alpha$  as a single free parameter. Moreover, we constrain  $\alpha$  to take values  
322 between 1 and 2, by imposing a Gaussian prior on this parameter with a mean of 1.50 and a  
323 standard deviation of 0.20.

324

## 325 **Results**

326

### 327 **Discrimination task**

328 To estimate the effect of ellipse elongation on the sensory precision with which subjects  
329 encoded the stimulus orientations, we fit two models to each subject's data in the discrimination  
330 task. In both models, stimulus observations are assumed to be corrupted by Gaussian noise.  
331 Under this assumption, the predicted proportion of “clockwise” responses is a cumulative  
332 Gaussian as a function of stimulus orientation. We refer to the standard deviation of this  
333 Gaussian as the sensory noise level. In the first model, the noise level is independent of ellipse  
334 elongation and fitted as a single free parameter. In the second model, the sensory noise levels  
335 are fitted as separate parameters for the low- and high-reliability stimuli, which we denote by  
336  $\tilde{\sigma}_{\text{low}}$  and  $\tilde{\sigma}_{\text{high}}$ , respectively. The second model accounts well for the data (Fig. 1B) and model  
337 comparison favors this model for every subject ( $\Delta\text{AIC}$  range: 0.50 to 22.3; mean $\pm$ sem:

338  $8.6 \pm 1.3^3$ ). Moreover, for all subjects the estimated noise level is higher for the low-reliability  
339 stimulus than for the high-reliability stimulus (Table 2). Hence, the stimulus-reliability  
340 manipulation works as intended. As described in Methods, we use the estimates of  $\tilde{\sigma}_{\text{low}}$  and  
341  $\tilde{\sigma}_{\text{high}}$  to customize the target and distractor distributions in the visual search experiment (Table  
342 2) and to constrain the models fitted to the data from that experiment.

343

#### 344 **Visual search with unlimited display time**

345 **Evidence for suboptimalities.** Since stimuli in these conditions were high in contrast  
346 and could be inspected for as long as a subject wanted, we assume for the moment that sensory  
347 noise was negligible<sup>4</sup>. Under this assumption, Eq. (6) specifies the optimal decision variable,  
348  $d(\mathbf{s})$ , which we can compute for each trial without the need to fit any free parameters. The  
349 optimal observer responds “target present” if  $d(\mathbf{s}) > 0$  and “target absent” otherwise. In other  
350 words, if subjects are optimal, then their proportion of “target present” responses should be a  
351 step function of  $d(\mathbf{s})$ , transitioning from 0 to 1 at  $d(\mathbf{s}) = 0$  (Fig. 3A, red lines). In all three  
352 conditions, subjects clearly deviate from this prediction (Fig. 3A, black circles), which suggests  
353 that they performed suboptimally.

354 We hypothesize that the suboptimality is caused by the kind of inferential imperfections  
355 that we intend to capture with the computational noise parameter. Consistent with this  
356 hypothesis, we find that the data are well accounted for by the model that uses Eq. (7) to  
357 compute the decision variable (Fig. 3A, black curve).

358

---

<sup>3</sup> Throughout the paper  $X \pm Y$  refers to mean  $\pm$  sem across subjects, unless stated otherwise.

<sup>4</sup> Later in this section, we provide an analysis where we do not make this assumption.

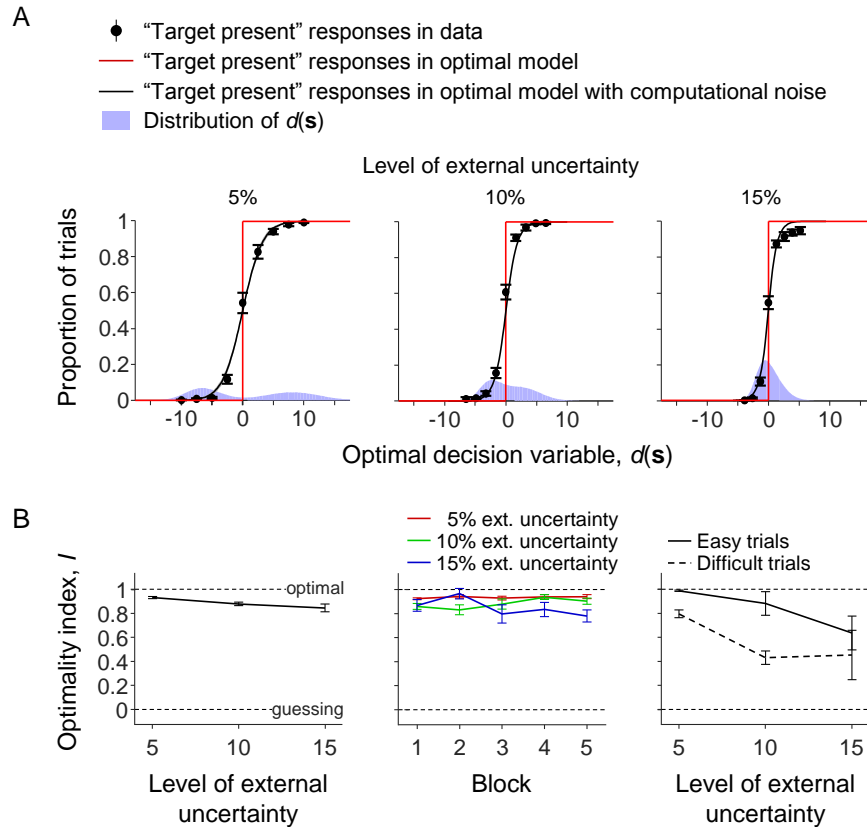

**Fig. 3. Results from the visual search conditions with unlimited display.** (A) Assuming that sensory noise was negligible in these conditions, the optimal model (red) predicts that the proportion of “target present” responses is a step function of the optimal decision variable,  $d(\mathbf{s})$ . The subject data (black markers) clearly deviate from this prediction. The data are well accounted for by a model in which the optimal decision variable is corrupted by Gaussian noise (black curves). (B) The optimality index decreases with the level of external uncertainty (left), did not systematically change across blocks (center), and was lower for difficult trials than for easy ones (right). Note that the distribution of  $d(\mathbf{s})$  (purple areas in panel A) becomes more concentrated around zero as the level of external uncertainty increases. This explains why performance decreases with the level of external uncertainty (panel B), despite the response data becoming more step-like.

359

360

361 **Quantification of optimality loss.** To quantify how much subject performance deviated

362 from optimal performance, we introduce an index  $I$  that measures performance on a scale that

363 extends from random guessing to optimal performance,

364

$$I \equiv \frac{p_{\text{subject}} - p_{\text{guess}}}{p_{\text{optimal}} - p_{\text{guess}}}, \quad (8)$$

365 where  $p_{\text{subject}}$  is the subject's proportion of correct responses,  $p_{\text{guess}}$  is chance-level accuracy

366 (0.50 in all our tasks), and  $p_{\text{optimal}}$  is the accuracy expected from an optimal observer. When

367 there is no sensory noise,  $p_{\text{optimal}}$  can be computed in a parameter-free way, namely as the  
368 proportion of trials in which the sign of the optimal decision variable, Eq. (6), is equal to the  
369 sign of the binary variable that specifies target presence,  $T$ . The index takes values between 0  
370 and 1, with 0 corresponding to random guessing and 1 to optimal behavior.

371 The subject-averaged optimality index across all three conditions is  $0.877 \pm 0.015$  (Fig. 3B,  
372 left). A Bayesian one-sample t-test reveals extremely strong evidence for the hypothesis  $I < 1$   
373 ( $\text{BF}_{-0} = 5.51 \cdot 10^6$ ). This hypothesis is also supported when analyzing the index separately in each  
374 of the three conditions,  $\text{BF}_{-0} > 701$ . Moreover, a Bayesian one-way ANOVA provides evidence  
375 for the hypothesis that the optimality index depends on the level of external uncertainty where  
376 the optimality index decreases with increasing levels of external uncertainty ( $\text{BF}_{10} = 15.7$ ). At  
377 first sight, the latter finding may seem to contradict the pattern observed in Fig. 3A: if the  
378 optimality index decreases with external uncertainty, how is it then possible that the response  
379 curve increasingly resembles the step function predicted by the optimal observer? This can be  
380 explained by considering differences in the distribution of  $d(\mathbf{s})$  across conditions: the larger the  
381 external uncertainty, the more difficult the task, i.e., the more narrowly  $d(\mathbf{s})$  is concentrated  
382 around 0. Therefore, when the level of external uncertainty is larger, the deviations from the  
383 step function matter more for task accuracy than when there is a wider spread of  $d(\mathbf{s})$ .

384 **Ruling out alternative explanations of the optimality loss.** A one-way Bayesian ANOVA  
385 reveals strong evidence against an effect of block on the optimality index ( $\text{BF}_{01} = 21.2$ ; Fig. 3B,  
386 center), which suggests that the suboptimality is not simply caused by a lack of learning at the  
387 beginning of the session. Moreover, we find a difference between the suboptimality index for  
388 easy and difficult trials (Fig. 3B, right; Bayesian one-way ANOVA  $\text{BF}_{10} = 134$ )<sup>5</sup>. This suggests  
389 that the suboptimality is also not caused by attentional lapses, which would be expected to affect  
390 optimality similarly in easy and difficult trials. In addition, if subjects had been guessing on a

---

<sup>5</sup> Difficulty was measured as the absolute value of decision variable  $d(\mathbf{s})$ . Trials with  $|d(\mathbf{s})|$  smaller than the first quartile were defined as difficult and trials with  $|d(\mathbf{s})|$  larger than the third quartile were defined as easy.

391 significant proportion of trials, then the asymptotes in their response curves (Fig. 3A) would  
392 have deviated from 0 and 1, which does not seem to be the case. Hence, neither a lack of learning  
393 nor guessing due to attentional lapses seems to be a plausible explanation of the suboptimality.

394 **Validating the assumption that sensory noise was negligible.** So far, we have assumed  
395 that there is no sensory noise in these conditions,  $\sigma_i=0$ . However, despite the unlimited display  
396 time, it is unlikely that subjects encoded stimulus orientations without any error at all. To obtain  
397 an estimate of  $\sigma_i$  in these conditions, we conduct a control experiment that is identical to the  
398 discrimination experiment (Fig. 1A), except that the stimulus has an ellipse eccentricity of 0.97  
399 and stays on the screen until a response is given. By fitting a cumulative Gaussian to the data  
400 from this experiment, we find an estimate of  $\sigma_i=0.875\pm 0.097$ . Recomputing the optimality index  
401 under this value of sensory noise gives  $I=0.898\pm 0.016$ , which is barely higher than the  
402  $0.877\pm 0.015$  we found under the assumption of  $\sigma_i=0$ . Indeed, a Bayesian t-test does not provide  
403 any evidence for a difference ( $BF_{01}=2.59$ ). Hence, even though sensory noise may not entirely  
404 have been eliminated in the conditions with unlimited stimulus presentation time, it was so low  
405 that the effect on the optimality index was negligible.

406 **Conclusions.** We draw three conclusions from the visual search tasks with unlimited  
407 stimulus time. First, the data present evidence for a suboptimality. Second, the degree of  
408 suboptimality increases with the level of external uncertainty. Third, the suboptimality cannot  
409 be explained as the result of guessing or a lack of learning, but is well accounted for by a model  
410 in which the optimal decision variable is corrupted by Gaussian noise.

411

## 412 **Visual search with short display times**

413 **Model comparison.** We hypothesize that there may be two kinds of suboptimality  
414 beyond sensory noise: suboptimal cue weighting (model factor 1) and computational  
415 imperfections (model factor 2). To quantify evidence for these hypotheses, we fit a factorial set

416 of six models and compute the relative support for each of them (Table 5). The best-fitting  
417 model – and the only one that is supported by the data – is the model that includes both types  
418 of suboptimality (M4). We find no support for models in which subjects ignore differences in  
419 stimulus reliability (M1 and M2), which is consistent with findings in previous studies  
420 [13,19,21]. However, in contrast to those studies, we also find no support for the models in  
421 which subjects weight stimuli optimally (M5 and M6)<sup>6</sup>. Therefore, the data suggest that subjects  
422 take stimulus reliability into account, but may do so suboptimally. Finally, there is no support  
423 for any model that does not include computational noise.

424

425 **Table 5. Overview of strength of support for each model, measured as the subject-**  
426 **averaged AIC value relative to the best-fitting model (M4). The interpretation of the**  
427 **evidence is based on the rules of thumb provided in [39].**

| Model | Sensory weighting | Computational noise | $\Delta$ AIC    | Interpretation |
|-------|-------------------|---------------------|-----------------|----------------|
| M1    | None              | No                  | $61.8 \pm 8.8$  | No support     |
| M2    | None              | Yes                 | $34.3 \pm 5.0$  | No support     |
| M3    | Suboptimal        | No                  | $12.1 \pm 4.2$  | No support     |
| M4    | Suboptimal        | Yes                 | 0               | Best model     |
| M5    | Optimal           | No                  | $60.1 \pm 18.2$ | No support     |
| M6    | Optimal           | Yes                 | $37.7 \pm 12.1$ | No support     |

428

429 **Model fits.** Although the data provide no support for the optimal model  
430 ( $\Delta$ AIC= $60.1 \pm 18.2$ ), its account of the subject-averaged hit and false alarm rates is visually only  
431 slightly worse than that of the best-fitting model, except in the condition with the highest level  
432 of uncertainty (Fig. 4A). However, suboptimal behavior at the level of individual subjects may  
433 appear optimal when viewed at the level of the group [23]. Indeed, when analyzed at the level

---

<sup>6</sup> Note, however, that this finding is not necessarily inconsistent with previous studies. Those studies compared the optimal model only to the no-weighting model and did not consider the option of suboptimal weights. If we had done the same here, we also would have concluded that subjects weighted evidence optimally.

434 of individual subjects<sup>7</sup>, the combined root mean squared error of the optimal model is almost  
 435 twice as large as that of the best-fitting suboptimal model (0.0979 vs. 0.0571). The model fits  
 436 in Fig. 4A also show that there are aspects of the data that neither of the models explain well.  
 437 In particular, both models consistently underestimate the hit rate when the target is the only  
 438 high-reliability item. This suggests that there may be additional suboptimalities in the data that  
 439 are not captured by the model.

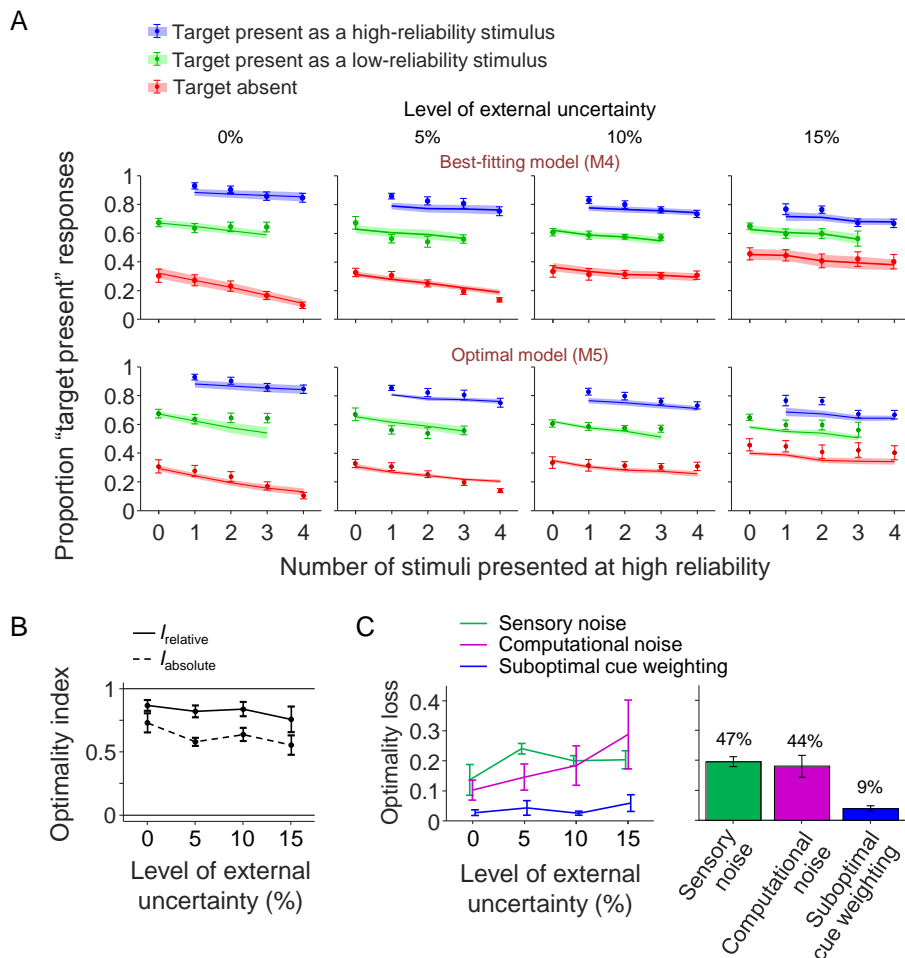

**Fig. 4. Results from the visual search conditions with short display time.** (A) False-alarm rates (red) and hit rates conditioned on whether the target had high reliability (blue) or low reliability (green). The data (markers) are well accounted for by the model with suboptimal weights and computational noise (curves). However, note that there seem to be some systematic deviations between the model behavior and the data, such as its consistent underestimation of the hit rate when only the target has high reliability. This suggests that there may be suboptimalities in the data that are not captured in the model. (B) Relative and absolute optimality index. The difference between the two indices represents the amount of optimality loss caused by sensory noise and the difference between the relative optimality index and 1 measures the amount of optimality loss due to other sources. (C) Optimality loss decomposed into three sources.

440

<sup>7</sup> Individual plots can be generated using the code and data provided at <https://osf.io/dkavj/>.

441           **Optimality index.** We next estimate how much subject performance deviates from  
442 optimal performance in these conditions. Because of the presence of sensory noise, we now  
443 make a distinction between absolute and relative optimality [3]. An observer is defined as  
444 optimal in the *absolute* sense when their accuracy equals that of a noiseless optimal observer.  
445 In the condition without external uncertainty, this corresponds to an accuracy level of 100%  
446 correct; in the other conditions, the maximum accuracy levels are dictated by experimental  
447 parameters  $\mu$  and  $\sigma_{\text{external}}$ . A subject is defined as optimal in the *relative* sense when accuracy is  
448 as high as possible given the subject's estimated levels of sensory noise. Both optimality indices  
449 – which we denote by  $I_{\text{absolute}}$  and  $I_{\text{relative}}$  – are computed using Eq. (8), with  $p_{\text{optimal}}$  being the  
450 only variable differing between the two measures. When computing  $I_{\text{absolute}}$ , we estimate  $p_{\text{optimal}}$   
451 in the same way as we did in the analysis of conditions with unlimited display time (see above).  
452 Computing  $p_{\text{optimal}}$  for the relative optimality index, however, requires an estimate of the  
453 subject's sensory noise levels. To get the best possible estimate available, we average the  
454 estimated sensory noise levels ( $\alpha\tilde{\sigma}_{\text{low}}$  and  $\alpha\tilde{\sigma}_{\text{high}}$ ) across all six models, where we weight each  
455 value by the model's AIC weight [40], such that better models contribute more strongly.

456           Averaged across subjects and conditions, we find  $I_{\text{absolute}} = 0.626 \pm 0.032$  and  $I_{\text{relative}} =$   
457  $0.822 \pm 0.032$  (Fig. 4B). The finding that  $I_{\text{absolute}} < I_{\text{relative}}$  ( $\text{BF}_{-0} = 910$ ) indicates that sensory noise  
458 affected task accuracy, as expected. Moreover, the finding that  $I_{\text{relative}} < 1$  ( $\text{BF}_{-0} = 15.3 \cdot 10^3$ )  
459 indicates that there are also suboptimalities beyond the effects of sensory noise.

460           **Decomposing sources of optimality loss.** We assess the relative impact separately for  
461 each of the three hypothesized sources of optimality loss: sensory noise, suboptimal weighting  
462 of sensory cues, and computational noise. We estimate the optimality loss due to sensory noise  
463 as the difference between  $I_{\text{absolute}}$  (the expected accuracy for a noiseless, optimal observer) and  
464  $I_{\text{relative}}$  (the expected accuracy for an optimal observer with sensory noise). Averaged across  
465 subjects and levels of external uncertainty, we find that the optimality loss due to sensory noise



466 is  $0.195 \pm 0.016$ . To compute the optimality loss from the other two sources, we take for each  
467 subject the maximum-likelihood fit of model M4 and use simulations to compute how much  
468 the optimality index increases when “turning off” either type of suboptimality. We find that  
469 replacing the suboptimal weights with the optimal ones increases the optimality index with  
470  $0.039 \pm 0.009$  and setting the computational noise to zero increases it with  $0.179 \pm 0.035$  (Fig.  
471 4C). Expressed in percentages, sensory noise accounts for an estimated 47% of optimality loss,  
472 computational noise for 44%, and suboptimal weighting for the remaining 9%.

### 473 **Comparison of optimality loss between conditions with and without sensory noise.**

474 In the conditions with unlimited display time we found an optimality index of  $0.877 \pm 0.015$ ,  
475 which is slightly higher than the relative suboptimality index  $I_{\text{relative}} = 0.822 \pm 0.032$  found in the  
476 conditions with short display times. However, a Bayesian independent samples t-test provides  
477 no evidence for the hypothesis that the average suboptimality index differs between conditions  
478 with and without sensory noise ( $\text{BF}_{10} = 0.53$ )<sup>8</sup>. Hence, adding sensory uncertainty to the visual  
479 search task does not seem to have a major impact on suboptimalities from other sources. In  
480 contrast to the conditions with unlimited display time, however, we now find no evidence for  
481 an effect of the level of external uncertainty on the relative optimality index ( $\text{BF}_{01} = 5.06$ ).

482 **Conclusions.** The four main findings from the analysis of the visual search tasks with  
483 short display time are as follows. First, there is evidence for a deviation from optimality that  
484 goes beyond the effects of sensory noise, which is at odds with previous reports of (relative)  
485 optimality in human visual search. Second, although there is strong evidence for a suboptimality  
486 in cue weighting, the effects are relatively small. Third, addition of sensory noise to this task  
487 does not substantially affect the degree of suboptimality in downstream computations. Finally,

---

<sup>8</sup> This test was performed only on the data from the conditions with 5, 10, and 15% external uncertainty, because the experiment with unlimited display time did not include a condition with 0% external uncertainty. When including the condition with 0% external uncertainty in the experiment with short display time, the outcome is very similar ( $\text{BF}_{10} = 0.58$ ).

488 there is no evidence that the degree of suboptimality depends on the level of external  
489 uncertainty.

490

#### 491 **Verification of analysis methods**

492 A possible concern about our analyses is that – despite the measures we took to reduce model  
493 flexibility – sensory noise, suboptimal cue weighting, and computational noise may have had  
494 partly interchangeable effects on the model predictions. If so, then there is a risk that data from  
495 optimal observers – whose performance is only affected by sensory noise – may give rise to  
496 spurious evidence for suboptimal cue weighting and computational noise. Therefore, we verify  
497 the reliability of our findings by applying the same methods to three synthetic data sets.

498 **Synthetic dataset 1: optimal observers.** In the first of these analyses, we use the  
499 optimal model (M5) to generate ten datasets at each level of external uncertainty, with the same  
500 number of trials as in the subject data. In each simulation, the value of the only free model  
501 parameter,  $\alpha$ , is drawn from a uniform distribution between 1 and 2. If our methods are reliable,  
502 then we should find no evidence for suboptimalities in these synthetic data. Consistent with  
503 this, we find that an AIC-based model comparison correctly selects the optimal model as the  
504 preferred model. Moreover, we find a relative optimality index of  $0.986 \pm 0.012$  and evidence  
505 for the null hypothesis that the average of the population from which these values originate is  
506 1 ( $BF_{01}=3.2$ ). Hence, our methods are unlikely to provide evidence for suboptimalities on data  
507 from optimal observers.

508 **Synthetic dataset 2: observers with suboptimal cue weights.** The second analysis is  
509 analogous to the first one, except that we use the model variant with suboptimal weights (M1)  
510 to generate the synthetic data. We find that the model comparison correctly selects M1 as the  
511 preferred model. Moreover, we find a relative optimality index equal to  $0.857 \pm 0.017$ , which

512 indicates clear evidence for a suboptimality beyond sensory noise. Decomposition of the  
513 optimality loss suggests that 59% is caused by sensory noise, 38% by suboptimal cue weighting,  
514 and 3% by computational noise. Hence, as expected, our methods identify sensory noise and  
515 suboptimal cue weighting as factors that strongly affected accuracy in this dataset, but not  
516 computational noise. This means that even though suboptimal weighting appears as  
517 computational noise on the optimal decision variable (Fig. 2, bottom right), these two factors  
518 are not confounded in the models. The reason is that suboptimal weighting causes *systematic*  
519 errors in the decision variable, which model M1 can explain on a trial-by-trial basis, while  
520 models with computational noise only explain the effect that these errors have on the hit- and  
521 false-alarm rate averaged across trials.

522 **Synthetic dataset 3: observers with computational noise.** Finally, we perform a  
523 similar analysis on data generated from the model with computational noise (M6). As expected,  
524 model comparison selects M6 as the preferred model on these data. Moreover, the relative  
525 optimality index is  $0.665 \pm 0.033$  and the decomposition analysis estimates that 33% of the  
526 optimality loss is due to sensory noise, 1% due to suboptimal weighting, and 66% due to  
527 computational noise.

528 **Conclusions.** These simulation results show that our methods do not produce evidence  
529 for suboptimalities when applied to data generated from the optimal model. Hence, the  
530 suboptimalities found in the subject data are unlikely to be the result of a flaw in analysis  
531 methods. Moreover, the results show that the methods reliably distinguish between effects of  
532 suboptimal cue weighting and effects of computational noise, which validates our  
533 decomposition analysis.

534

## 535 **General discussion**

536

## 537 **Summary of results**

538 In this study, we re-examined human performance on visual-search tasks by making several  
539 methodological improvements over previous studies. First, we used an experimental design that  
540 included conditions without sensory noise, which allowed us to estimate deviations from  
541 optimality without fitting any free parameters. Second, in conditions with sensory noise, we  
542 constrained model parameters by using prior knowledge obtained from a separate task. Third,  
543 we tested the optimal model against a more general type of suboptimal model than previous  
544 studies. Fourth, we decomposed loss of optimality into three sources and quantified the  
545 contribution of each of them. Our results show evidence for suboptimalities in human visual  
546 search, at all tested levels of internal and external noise. In the conditions with sensory noise,  
547 we estimated that about 47% of the accuracy loss was due to sensory noise, 9% due to  
548 suboptimal weighting of sensory cues, and the remaining 44% due to other computational  
549 imperfections. Our results are consistent with previous evidence that humans take stimulus  
550 reliability near-optimally into account during perceptual inference (e.g., [13,18,19,21]).  
551 However, they do not support previous suggestions that human visual-search behavior is  
552 optimal (e.g., [13–16]). Instead, they support recent evidence suggesting that inference in neural  
553 systems is inherently imprecise [27,28,30,31].

554

## 555 **Related work**

556 Our approach and our findings bear similarities to recent work by Drugowitsch and colleagues  
557 [27]. They used a visual categorization task in which subjects were presented on each trial with  
558 a sample of sixteen stimuli, whose orientations were drawn from one of two or three  
559 distributions. The subject's task was to indicate from which of the distributions the orientations

560 were drawn. Just as in our task, the optimal decision variable for this task is based on a sum of  
561 local decision variables, each of which is itself a non-linear function of a stimulus observation.  
562 Drugowitsch et al. reported evidence for suboptimalities in behavior due to computational  
563 imprecisions, which is consistent with our own findings. However, whereas we found that such  
564 imprecisions accounted for around 53% of the total optimality loss in the conditions with  
565 sensory noise, Drugowitsch et al. reported an estimate of over 90%. One possible explanation  
566 for this difference is that computational imprecisions may be smaller in visual search compared  
567 to categorization. However, an alternative explanation – which we believe is more plausible –  
568 is that sensory noise levels were simply larger in our experiment, due to difference in stimulus  
569 presentation time (67 ms to encode four stimuli in our study; 333 ms per stimulus in the study  
570 by Drugowitsch et al.).

571         Although we are not aware of any other studies that have decomposed sources of  
572 suboptimality in perceptual inference tasks, several other studies have reported evidence for the  
573 general presence of suboptimalities in such tasks. For example, numerous sensory cue  
574 combination studies have reported overweighting of one of the sensory cues [41–48], Bhardwaj  
575 et al. [49] found that visual search performance is suboptimal when stimuli are correlated, and  
576 Qamar et al. [50] found that some of their human and monkey subjects used a suboptimal  
577 decision rule in a visual categorization task.

578         Our study is also not the first to test models in which the optimal decision variable is  
579 corrupted by noise. An example of our own previous work – in which we referred to it as  
580 “decision noise” – concerns the change detection study by Keshvari et al. [19], where we found  
581 that inclusion of this noise parameter did not substantially improve the model fits. However,  
582 sensory noise levels in that study were fitted in an entirely unconstrained way, while it is  
583 conceivable that there was a trade-off between effects of noise on the decision variable and

584 effects of sensory noise on model predictions. Moreover, in that study we assumed random  
585 variability in encoding precision, which – as it turns out – is easily confounded with decision  
586 noise [51]. Therefore, it is possible that imprecisions in inference went unnoticed due to  
587 confounding them with sensory noise and variability in precision. Another example of work  
588 that has considered noise on the decision variable is a collection of studies by Summerfield and  
589 colleagues, who refer to it as “late noise” (e.g., [52,53]). They have shown that in the presence  
590 of such noise, subjects can and often do obtain performance benefits by using “robust  
591 averaging”, i.e., down-weighting outlier cues (compared to the optimal observer) when  
592 computing the global decision variable. We performed simulations to examine whether this  
593 strategy may also give performance benefits in our visual search task, but we did not find any  
594 clear evidence for it. One difference between our task and the tasks typically used by  
595 Summerfield et al. is that in their case each cue is a stimulus observation, while in our case they  
596 are non-linear functions of stimulus observations (Eq. (2)). Further work is required to examine  
597 whether this difference explains why robust averaging does not seem to be a beneficial strategy  
598 in visual search.

599 Finally, the within-display manipulation of stimulus reliability that we used here has  
600 been applied in earlier studies using visual search [13], categorization [18], change detection  
601 [19], and same/different discrimination [21] experiments. Consistent with those studies, we  
602 found strong evidence against models that give equal weight to stimuli with low and high  
603 reliability. Although we found evidence for a discrepancy between the estimated weights used  
604 by the subjects and the optimal weights, the optimality loss caused by this discrepancy was  
605 small (8%). Therefore, our findings suggest that – despite our evidence for inferential  
606 suboptimalities – subjects weighted sensory cues near-optimally by their reliability.

## 607 **External uncertainty**

608 Unlike most previous studies on visual search, we added external noise to the stimuli (however,  
609 see [54] for a similar manipulation). We believe that this approach has two advantages over  
610 using deterministic stimuli that could make it valuable in other perception studies too. First, it  
611 allows the experimenter to include task conditions without sensory noise. As demonstrated here,  
612 such conditions allow the experimenter to assess deviations from optimality without the need  
613 to fit free parameters. However, a second advantage is that tasks with external uncertainty may  
614 be more consistent with naturalistic conditions, where errors in judgment often arise not only  
615 due to sensory uncertainty but also due to external ambiguities, for example caused by imperfect  
616 correlations between features in the environment. Due to such ambiguities, naturalistic stimuli  
617 are often probabilistic rather than deterministic [32], which prevents even a noiseless optimal  
618 observer from reaching 100% correct performance.

619 Our results regarding the effect of external uncertainty on optimality are inconclusive:  
620 an effect was found in the conditions without sensory noise, but not in the conditions with  
621 sensory noise. One possibility is that the identified effect was a statistical fluke. However, an  
622 alternative possibility is that an effect is simply harder to establish in the presence of sensory  
623 noise. As explained above, computing the optimality index then requires estimating the  
624 subject's level of sensory noise. Imprecisions in these estimates will increase the variance of  
625 the optimality-index estimates which, in turn, will reduce the likelihood of finding statistically  
626 significant effects. Consistent with this reasoning, we found that the variance in the optimality  
627 index estimates was indeed more than 7 times larger in the conditions with sensory noise.

628

## 629 **Further decomposition of sources of suboptimality**

630 In the conditions with sensory noise, we decomposed suboptimalities into three sources:  
631 sensory noise, suboptimal cue weighting, and computational noise. In our experiment, these

632 sources accounted for about 47%, 9%, and 44%, respectively, of the optimality loss. The first  
633 two sources have quite a specific interpretation, but effects captured by the computational noise  
634 parameter could stem from a number of different sources, such as random variability in the  
635 neurons that represent the local and global decision variables, imprecise knowledge of  
636 experimental parameters – such as the stimulus distributions – and the use of a suboptimal cue  
637 integration rule. We tried to further decompose suboptimalities into these more specific sources,  
638 but were unable to do so. The problem is that different types of suboptimalities have near-  
639 identical effects on the response data, due to which we were unable to reliably distinguish  
640 models that implemented more specific kinds of suboptimalities. Future studies may try to solve  
641 this model-identifiability problem by using experimental paradigms that provide a richer kind  
642 of behavior data to further constrain the models (e.g., by collecting confidence ratings [55]).  
643 Our experimental design also did not allow us to distinguish between systematic suboptimalities  
644 and random ones. Future studies could address this by using a double-pass paradigm [27,55].  
645 The feasibility of this approach is highlighted in the study by Drugowitsch et al. [27], who  
646 estimated that in their visual categorization task about two-thirds of the inferential imprecisions  
647 were random and the other one third systematic.

648

## 649 **References**

- 650 1. Knill DC, Pouget A. The Bayesian brain: The role of uncertainty in neural coding and  
651 computation. *Trends in Neurosciences*. 2004. pp. 712–719.  
652 doi:10.1016/j.tins.2004.10.007
- 653 2. Knill DC, Richards W, editors. *Perception as Bayesian Inference*. Cambridge  
654 University Press; 1996.
- 655 3. Ma WJ. Organizing probabilistic models of perception. *Trends Cogn Sci*. 2012;16:



- 656 511–8. doi:10.1016/j.tics.2012.08.010
- 657 4. Geisler WS. Contributions of ideal observer theory to vision research. *Vision Research*.  
658 2011. pp. 771–781. doi:10.1016/j.visres.2010.09.027
- 659 5. Trommershäuser J, Körding KP, Landy MS. Sensory Cue Integration. *Sensory Cue*  
660 *Integration*. 2012. doi:10.1093/acprof:oso/9780195387247.001.0001
- 661 6. Landy MS, Banks MS, Knill DC. Ideal-Observer Models of Cue Integration. *Sensory*  
662 *Cue Integration*. 2012. doi:10.1093/acprof:oso/9780195387247.003.0001
- 663 7. Ernst MO, Banks MS. Humans integrate visual and haptic information in a statistically  
664 optimal fashion. *Nature*. 2002;415: 429–33. doi:10.1038/415429a
- 665 8. van Beers RJ, Sittig AC, Gon JJ. Integration of proprioceptive and visual position-  
666 information: An experimentally supported model. *J Neurophysiol*. 1999;81: 1355–  
667 1364.
- 668 9. Alais D, Burr D. The ventriloquist effect results from near-optimal bimodal integration.  
669 *Curr Biol*. Elsevier; 2004;14: 257–62. doi:10.1016/j.cub.2004.01.029
- 670 10. Jacobs RA. Optimal integration of texture and motion cues to depth. *Vision Res*.  
671 1999;39: 3621–3629. doi:10.1016/S0042-6989(99)00088-7
- 672 11. Landy MS, Maloney LT, Johnston EB, Young M. Measurement and modeling of depth  
673 cue combination: in defense of weak fusion. *Vision Res*. 1995; doi:10.1016/0042-  
674 6989(94)00176-M
- 675 12. Hillis JM, Watt SJ, Landy MS, Banks MS. Slant from texture and disparity cues:  
676 Optimal cue combination. *J Vis*. 2004;4: 1. doi:10.1167/4.12.1
- 677 13. Ma WJ, Navalpakkam V, Beck JM, Berg R van den, Pouget A. Behavior and neural

- 678 basis of near-optimal visual search. *Nat Neurosci.* 2011;14: 783–790.  
679 doi:10.1038/nn.2814
- 680 14. Vincent BT, Vincent BT, Baddeley RJ, Baddeley RJ, Troscianko T, Troscianko T, et  
681 al. Optimal feature integration in visual search. *J Vis.* 2009;9: 1–11.  
682 doi:10.1167/9.5.15.Introduction
- 683 15. Mazyar H, van den Berg R, Ma WJ. Does precision decrease with set size? *J Vis.*  
684 2012;12: 10. doi:10.1167/12.6.10
- 685 16. Palmer J, Verghese P, Pavel M. The psychophysics of visual search. *Vision Research.*  
686 2000. pp. 1227–1268. doi:10.1016/S0042-6989(99)00244-8
- 687 17. Navalpakkam V, Koch C, Perona P. Homo economicus in visual search. *J Vis.*  
688 2009;9(1): 1–16. doi:10.1167/9.1.31.Introduction
- 689 18. Shen S, Ma WJ. A Detailed Comparison of Optimality and Simplicity in Perceptual  
690 Decision Making. *Psychol Rev.* 2016;123: 452.
- 691 19. Keshvari S, van den Berg R, Ma WJ. Probabilistic computation in human perception  
692 under variability in encoding precision. *PLoS One.* 2012;7.
- 693 20. Van Den Berg R, Shin H, Chou W-C, George R, Ma WJ. Variability in encoding  
694 precision accounts for visual short-term memory limitations. *Proc Natl Acad Sci.*  
695 2012;109: 8780–8785. doi:10.1073/pnas.1117465109
- 696 21. van den Berg R, Vogel M, Josic K, Ma WJ. Optimal inference of sameness. *Proc Natl*  
697 *Acad Sci U S A.* 2012;109: 3178–83. doi:10.1073/pnas.1108790109
- 698 22. Rosas P, Wichmann FA. Cue Combination: Beyond Optimality. *Sensory Cue*  
699 *Integration.* 2012. doi:10.1093/acprof:oso/9780195387247.003.0008

- 700 23. Rahnev D, Denison RN. Suboptimality in Perceptual Decision Making. Behavioral and  
701 Brain Sciences. 2018: 1–107. doi:10.1017/S0140525X18000936
- 702 24. Jones M, Love BC. Bayesian Fundamentalism or Enlightenment? On the explanatory  
703 status and theoretical contributions of Bayesian models of cognition. Behav Brain Sci.  
704 Cambridge University Press; 2011;34: 169-88; discussion 188-231.  
705 doi:10.1017/S0140525X10003134
- 706 25. Bowers JS, Davis CJ. Bayesian just-so stories in psychology and neuroscience. Psychol  
707 Bull. 2012;138: 389–414. doi:10.1037/a0026450
- 708 26. Marcus GF, Davis E. How Robust Are Probabilistic Models of Higher-Level  
709 Cognition? Psychol Sci. 2013; doi:10.1177/0956797613495418
- 710 27. Drugowitsch J, Wyart V, Devauchelle A-DD, Koechlin E, Acerbi L, Vijayakumar S, et  
711 al. Computational Precision of Mental Inference as Critical Source of Human Choice  
712 Suboptimality. Neuron. 2016;92: 1398–1411. doi:10.1016/j.neuron.2016.11.005
- 713 28. Beck JM, Ma WJ, Pitkow X, Latham PE, Pouget A. Not Noisy, Just Wrong: The Role  
714 of Suboptimal Inference in Behavioral Variability. Neuron. 2012. pp. 30–39.  
715 doi:10.1016/j.neuron.2012.03.016
- 716 29. Faisal AA, Selen LPJ, Wolpert DM. Noise in the nervous system. Nat Rev Neurosci.  
717 2008;9: 292–303. doi:10.1038/nrn2258
- 718 30. Renart A, Machens CK. Variability in neural activity and behavior. Current Opinion in  
719 Neurobiology. 2014. pp. 211–220. doi:10.1016/j.conb.2014.02.013
- 720 31. Wyart V, Koechlin E. Choice variability and suboptimality in uncertain environments.  
721 Current Opinion in Behavioral Sciences. 2016. pp. 109–115.

- 722           doi:10.1016/j.cobeha.2016.07.003
- 723   32.   Juslin P, Olsson H. Thurstonian and Brunswikian origins of uncertainty in judgment: a  
724           sampling model of confidence in sensory discrimination. *Psychol Rev.* 1997;104: 344–  
725           366. doi:10.1037/0033-295X.104.2.344
- 726   33.   Brainard DH. The Psychophysics Toolbox. *Spat Vis.* 1997;10: 433–436.  
727           doi:10.1163/156856897X00357
- 728   34.   JASP Team. JASP (Version 0.8.4.0) [Computer program]. 2018.
- 729   35.   Ma WJ, Jazayeri M. Neural Coding of Uncertainty and Probability. *Annu Rev*  
730           *Neurosci.* 2014;37: 205–220. doi:10.1146/annurev-neuro-071013-014017
- 731   36.   Mazyar H, Van den Berg R, Seilheimer RL, Ma WJ. Independence is elusive : Set size  
732           effects on encoding precision in visual search. *J Vis.* 2013;13: 1–14.  
733           doi:10.1167/13.5.8.doi
- 734   37.   Acerbi L, Ma WJ. Practical Bayesian Optimization for Model Fitting with Bayesian  
735           Adaptive Direct Search. *Advances in Neural Information Processing Systems* 30. 2017.  
736           pp. 1836–1846. doi:<https://doi.org/10.1101/150052>
- 737   38.   Akaike H. A New Look at the Statistical Model Identification. *IEEE Trans Automat*  
738           *Contr.* 1974;19: 716–723. doi:10.1109/TAC.1974.1100705
- 739   39.   Burnham KP, Anderson DR. Multimodel inference: Understanding AIC and BIC in  
740           model selection. *Sociological Methods and Research.* 2004. pp. 261–304.  
741           doi:10.1177/0049124104268644
- 742   40.   Wagenmakers E-J, Farrell S. AIC model selection using Akaike weights. *Psychon Bull*  
743           *Rev.* 2004;11: 192–196. doi:10.3758/BF03206482

- 744 41. Battaglia PW, Jacobs RA, Aslin RN. Bayesian integration of visual and auditory  
745 signals for spatial localization. *J Opt Soc Am A*. 2003; doi:10.1364/JOSAA.20.001391
- 746 42. Burr D, Banks MS, Morrone MC. Auditory dominance over vision in the perception of  
747 interval duration. *Exp Brain Res*. 2009; doi:10.1007/s00221-009-1933-z
- 748 43. Maiworm M, Röder B. Suboptimal auditory dominance in audiovisual integration of  
749 temporal cues. *Tsinghua Sci Technol*. 2011; doi:10.1016/S1007-0214(11)70019-0
- 750 44. Fetsch CR, Pouget A, Deangelis GC, Angelaki DE. Neural correlates of reliability-  
751 based cue weighting during multisensory integration. *Nat Neurosci*. 2012;  
752 doi:10.1038/nn.2983
- 753 45. Prsa M, Gale S, Blanke O. Self-motion leads to mandatory cue fusion across sensory  
754 modalities. *J Neurophysiol*. 2012; doi:10.1152/jn.00439.2012
- 755 46. Battaglia PW, Kersten D, Schrater PR. How haptic size sensations improve distance  
756 perception. *PLoS Comput Biol*. 2011; doi:10.1371/journal.pcbi.1002080
- 757 47. Knill DC, Saunders JA. Do humans optimally integrate stereo and texture information  
758 for judgments of surface slant? *Vision Res*. 2003; doi:10.1016/S0042-6989(03)00458-9
- 759 48. Rosas P, Wichmann FA, Wagemans J. Texture and object motion in slant  
760 discrimination: failure of reliability-based weighting of cues may be evidence for  
761 strong fusion. *J Vis*. 2007; doi:10.1167/7.6.3
- 762 49. Bhardwaj M, Van Den Berg R, Ma WJ, Josic K. Do people take stimulus correlations  
763 into account in visual search? *PLoS One*. 2016;11. doi:10.1371/journal.pone.0149402
- 764 50. Qamar AT, Cotton RJ, George R, Beck JM, Prezhdo E, Laudano A, et al. Trial-to-trial,  
765 uncertainty-based adjustment of decision boundaries in visual categorization. *Proc Natl*

- 766 Acad Sci U S A. 2013;110: 20332–7. doi:10.1073/pnas.1219756110
- 767 51. Shen S, Ma WJ. Variable precision in visual perception. bioRxiv. 2018; 153650.  
768 doi:10.1101/153650
- 769 52. Gardelle V De, Summer C, de Gardelle V, Summerfield C. Robust averaging during  
770 perceptual judgment. Proc Natl Acad Sci. 2011;108: 13341–13346.  
771 doi:10.1073/pnas.1104517108
- 772 53. Li V, Herce Castañón S, Solomon JA, Vandormael H, Summerfield C. Robust  
773 averaging protects decisions from noise in neural computations. PLoS Comput Biol.  
774 2017;13: e1005723. doi:10.1371/journal.pcbi.1005723
- 775 54. Baldassi S, Verghese P. Comparing integration rules in visual search. J Vis. 2002;2: 3–  
776 3. doi:10.1167/2.8.3
- 777 55. Cabrera CA, Lu ZL, Doshier BA. Separating decision and encoding noise in signal  
778 detection tasks. Psychol Rev. 2015;122: 429–460. doi:10.1037/a0039348
- 779
